# Supplementary material for: Associations between Wildfire Smoke Exposure and Health-Related Quality of Life: Findings from the Lovelace Smokers Cohort
Source: Research Square preprint supplement (doi:10.21203/rs.3.rs-7069099/v1), 2025-10-23
Supplement: Supplementary file 1 [file 80ccca20d43a85bfd8e16623.docx]

**Supplemental Material**

**Association between Wildfire Smoke Exposure and Health-Related Quality of Life: Findings from the Lovelace Smokers Cohort**

Qizhen Wu, Yanhong Huang, Lisa L. Sinclair, Huining Kang, Tyler Eshelman, Maria A. Picchi, Marissa Childs, José M. Cerrato, Yiliang Zhu, Su Zhang, Steven A. Belinsky, Matthew J. Campen, Xi Gong, Shuguang Leng

**Table of Contents**

**Table S1.** Associations of Smoke PM2.5 and BC with SGRQ Scores after Excluding Winter Data (N=681)

**Table S2.** Associations of Smoke PM2.5 and BC with SF-36 Score after Excluding Winter Data (N=681)

**Table S3.** Associations of Individual Residential Addresses based Wildfire Smoke PM2.5 and BC Measures with SGRQ Scores (N=747)

**Table S4.** Associations of Individual Residential Addresses based Wildfire Smoke PM2.5 and BC Measures with SF-36 Score (N=747)

**Table S5.** Associations of Wildfire Smoke PM2.5 (per 1 µg/m3) with SGRQ Scores Using the County-Level Daily WFS Dataset Developed by Dr. Childs et al (N=747)

**Table S6.** Associations of Wildfire Smoke PM2.5 (per 1 µg/m3) with SF-36 Score Using the County-Level Daily WFS Dataset Developed by Dr. Childs et al (N=747)

**Table S7.** Adjusted β Coefficients for Associations Between 7-Days Average Wildfire PM2.5 exposure (WFS PM2.5_7d in Table 3) and HRQoL, Stratified by Over One Year of Woodsmoke Exposure

**Table S8.** Adjusted β Coefficients for Associations Between 7-Days Average Wildfire PM2.5 exposure (WFS PM2.5_7d in Table 3) and HRQoL, Stratified by Sex

**Table S9.** Adjusted β Coefficients for Associations Between 7-Days Average Wildfire PM2.5 exposure (WFS PM2.5_7d in Table 3) and HRQoL, Stratified by Education Level

**Table S10.** Adjusted β Coefficients for Associations Between 7-Days Average Wildfire PM2.5 exposure (WFS PM2.5_7d in Table 3) and HRQoL, Stratified by Smoking Status

**Table S11.** Adjusted β Coefficients for Associations Between 7-Days Average Wildfire PM2.5 exposure (WFS PM2.5_7d in Table 3) and HRQoL, Stratified by Hispanic Ethnicity

**Table S12.** Adjusted β Coefficients for Associations Between 7-Days Average Wildfire PM2.5 exposure (WFS PM2.5_7d in Table 3) and HRQoL, Stratified by CMH Status

**Table S13.** Adjusted β Coefficients for Associations Between 7-Days Average Wildfire PM2.5 exposure (WFS PM2.5_7d in Table 3) and HRQoL, Stratified by History of Pulmonary Disease

**Figure S1.** Spearman correlations of wildfire smoke measures in LSC subjects

**Table S1. Associations of Smoke PM2.5 and BC with SGRQ Scores after Excluding Winter Data (N=681) ***

| **Exposure** | **Activity** | |  | **Impacts** | |  | **Symptom** | |  | **Total** | |
| --- | --- | --- | --- | --- | --- | --- | --- | --- | --- | --- | --- |
| **β (95%CI)** | ***P*** |  | **β (95%CI)** | ***P*** |  | **β (95%CI)** | ***P*** |  | **β (95%CI)** | ***P*** |
| PM2.5_7d (per 1 µg/m3) | 1.22 (-0.21, 2.66) | 0.096 |  | 0.56 (-0.30, 1.43) | 0.204 |  | 1.16 (-0.16, 2.49) | 0.085 |  | 0.89 (-0.16, 1.94) | 0.098 |
| PM2.5_15d (per 1 µg/m3) | 1.46 (-0.05, 2.98) | 0.059 |  | 0.85 (-0.06, 1.77) | 0.068 |  | 1.31 (-0.09, 2.71) | 0.066 |  | 1.18 (0.07, 2.28) | 0.037 |
| PM2.5_30d (per 1 µg/m3) | 1.25 (-0.39, 2.90) | 0.135 |  | 0.65 (-0.33, 1.64) | 0.195 |  | 1.11 (-0.41, 2.62) | 0.152 |  | 0.97 (-0.22, 2.17) | 0.111 |
| PM2.5_60d (per 1 µg/m3) | 0.57 (-1.24, 2.38) | 0.536 |  | 0.33 (-0.76, 1.42) | 0.555 |  | 0.50 (-1.17, 2.17) | 0.561 |  | 0.49 (-0.83, 1.81) | 0.469 |
| WFS PM2.5_7d (per 1 µg/m3) | 5.61 (1.93, 9.28) | 0.0029 |  | 3.24 (1.02, 5.46) | 0.0043 |  | 6.06 (2.67, 9.44) | 0.00048 |  | 4.68 (1.99, 7.36) | 0.00067 |
| WFS PM2.5_15d (per 1 µg/m3) | 5.45 (1.50, 9.39) | 0.0069 |  | 3.11 (0.74, 5.49) | 0.010 |  | 4.76 (1.12, 8.39) | 0.011 |  | 4.37 (1.49, 7.24) | 0.0030 |
| WFS PM2.5_30d (per 1 µg/m3) | 4.73 (0.40, 9.06) | 0.033 |  | 2.81 (0.21, 5.42) | 0.035 |  | 3.23 (-0.77, 7.22) | 0.114 |  | 3.68 (0.52, 6.83) | 0.023 |
| WFS PM2.5_60d (per 1 µg/m3) | 2.01 (-3.93, 7.95) | 0.507 |  | 1.59 (-1.99, 5.17) | 0.384 |  | 1.03 (-4.44, 6.51) | 0.711 |  | 1.81 (-2.53, 6.15) | 0.413 |
| WFS PM2.5_7d (per 0.05 µg/m3) | 0.28 (0.10, 0.46) | 0.0029 |  | 0.16 (0.05, 0.27) | 0.0043 |  | 0.30 (0.13, 0.47) | 0.00048 |  | 0.23 (0.10, 0.37) | 0.00067 |
| WFS PM2.5_15d (per 0.05 µg/m3) | 0.27 (0.08, 0.47) | 0.0069 |  | 0.16 (0.04, 0.27) | 0.010 |  | 0.24 (0.06, 0.42) | 0.011 |  | 0.22 (0.07, 0.36) | 0.0030 |
| WFS PM2.5_30d (per 0.05 µg/m3) | 0.24 (0.02, 0.45) | 0.033 |  | 0.14 (0.01, 0.27) | 0.035 |  | 0.16 (-0.04, 0.36) | 0.114 |  | 0.18 (0.03, 0.34) | 0.023 |
| WFS PM2.5_60d (per 0.05 µg/m3) | 0.10 (-0.20, 0.40) | 0.507 |  | 0.08 (-0.10, 0.26) | 0.384 |  | 0.05 (-0.22, 0.33) | 0.711 |  | 0.09 (-0.13, 0.31) | 0.413 |
| WFS BC_7d (per 0.05 µg/m3) | 5.38 (1.74, 9.03) | 0.0040 |  | 3.16 (0.96, 5.35) | 0.0049 |  | 6.02 (2.67, 9.37) | 0.00045 |  | 4.53 (1.88, 7.19) | 0.00086 |
| WFS BC_15d (per 0.05 µg/m3) | 5.46 (1.62, 9.30) | 0.0055 |  | 3.04 (0.73, 5.36) | 0.010 |  | 4.88 (1.34, 8.42) | 0.0071 |  | 4.35 (1.55, 7.15) | 0.0024 |
| WFS BC_30d (per 0.05 µg/m3) | 4.94 (0.90, 8.98) | 0.017 |  | 2.73 (0.30, 5.17) | 0.028 |  | 3.46 (-0.28, 7.19) | 0.070 |  | 3.72 (0.77, 6.67) | 0.014 |
| WFS BC_60d (per 0.05 µg/m3) | 2.93 (-2.74, 8.60) | 0.311 |  | 1.82 (-1.60, 5.23) | 0.298 |  | 1.40 (-3.83, 6.63) | 0.600 |  | 2.28 (-1.86, 6.42) | 0.281 |
| WFS days_7d (per 1 day) | 0.64 (-0.45, 1.72) | 0.250 |  | 0.43 (-0.23, 1.08) | 0.200 |  | 1.21 (0.21, 2.20) | 0.018 |  | 0.65 (-0.14, 1.45) | 0.106 |
| WFS days_15d (per 1 day) | 0.27 (-0.33, 0.86) | 0.379 |  | 0.27 (-0.09, 0.62) | 0.142 |  | 0.44 (-0.11, 0.98) | 0.115 |  | 0.32 (-0.12, 0.75) | 0.151 |
| WFS days_30d (per 1 day) | 0.23 (-0.14, 0.60) | 0.227 |  | 0.22 (-0.00, 0.45) | 0.051 |  | 0.19 (-0.15, 0.53) | 0.273 |  | 0.24 (-0.03, 0.51) | 0.083 |
| WFS days_60d (per 1 day) | -0.07 (-0.29, 0.15) | 0.507 |  | 0.01 (-0.12, 0.14) | 0.858 |  | -0.03 (-0.23, 0.17) | 0.758 |  | -0.02 (-0.18, 0.14) | 0.841 |
| WFS area_7d (per IQR) | 0.37 (0.05, 0.69) | 0.024 |  | 0.25 (0.06, 0.45) | 0.010 |  | 0.50 (0.20, 0.79) | 0.00096 |  | 0.35 (0.12, 0.58) | 0.0033 |
| WFS area_15d (per IQR) | 0.73 (-0.01, 1.46) | 0.053 |  | 0.52 (0.08, 0.96) | 0.020 |  | 0.84 (0.17, 1.52) | 0.015 |  | 0.69 (0.15, 1.22) | 0.012 |
| WFS area_30d (per IQR) | 0.70 (-0.39, 1.80) | 0.207 |  | 0.65 (-0.00, 1.31) | 0.052 |  | 0.74 (-0.26, 1.75) | 0.149 |  | 0.75 (-0.05, 1.54) | 0.067 |
| WFS area_60d (per IQR) | -0.57 (-2.55, 1.41) | 0.571 |  | 0.27 (-0.92, 1.46) | 0.658 |  | 0.11 (-1.71, 1.94) | 0.902 |  | 0.04 (-1.40, 1.49) | 0.953 |

Abbreviations: β, regression coefficient; BC, black carbon; CI, confidence interval; PM2.5, particle with aerodynamic diameter ≤ 2.5 µm; PM2.5 _X d, average PM2.5 concentration during the X days prior to the interview; SGRQ, St. George’s Respiratory questionnaire; WFS, Wildfire smoke. * Models were adjusted for age, sex, ethnicity, BMI, education level, current smokers, pack-years, and prevalence of airway obstruction (defined as FEV1/FVC ratio ≤ 70%). WFS estimates are the same as those reported in Table 3.

**Table S2. Associations of Smoke PM2.5 and BC with SF-36 Score after Excluding Winter Data (N=681) ***

| **Exposure** | **Mental Health Score** | |  | **Physical Health Score** | |
| --- | --- | --- | --- | --- | --- |
| **β (95%CI)** | ***P*** |  | **β (95%CI)** | ***P*** |
| PM2.5_7d (per 1 µg/m3) | -0.063 (-0.116, -0.010) | 0.020 |  | -0.065 (-0.117, -0.014) | 0.013 |
| PM2.5_15d (per 1 µg/m3) | -0.058 (-0.115, -0.002) | 0.043 |  | -0.068 (-0.123, -0.013) | 0.015 |
| PM2.5_30d (per 1 µg/m3) | -0.052 (-0.113, 0.009) | 0.092 |  | -0.062 (-0.121, -0.003) | 0.040 |
| PM2.5_60d (per 1 µg/m3) | -0.030 (-0.097, 0.038) | 0.389 |  | -0.066 (-0.132, -0.001) | 0.047 |
| WFS PM2.5_7d (per 1 µg/m3) | -0.180 (-0.316, -0.044) | 0.010 |  | -0.215 (-0.348, -0.083) | 0.0015 |
| WFS PM2.5_15d (per 1 µg/m3) | -0.133 (-0.279, 0.014) | 0.077 |  | -0.193 (-0.335, -0.050) | 0.0081 |
| WFS PM2.5_30d (per 1 µg/m3) | -0.083 (-0.243, 0.078) | 0.313 |  | -0.172 (-0.328, -0.017) | 0.030 |
| WFS PM2.5_60d (per 1 µg/m3) | -0.049 (-0.269, 0.170) | 0.660 |  | -0.207 (-0.421, 0.006) | 0.057 |
| WFS PM2.5_7d (per 0.05 µg/m3) | -0.009 (-0.016, -0.002) | 0.010 |  | -0.011 (-0.017, -0.004) | 0.0015 |
| WFS PM2.5_15d (per 0.05 µg/m3) | -0.007 (-0.014, 0.001) | 0.077 |  | -0.010 (-0.017, -0.003) | 0.0081 |
| WFS PM2.5_30d (per 0.05 µg/m3) | -0.004 (-0.012, 0.004) | 0.313 |  | -0.009 (-0.016, -0.001) | 0.030 |
| WFS PM2.5_60d (per 0.05 µg/m3) | -0.002 (-0.013, 0.009) | 0.660 |  | -0.010 (-0.021, 0.000) | 0.057 |
| WFS BC_7d (per 0.05 µg/m3) | -0.180 (-0.315, -0.045) | 0.0093 |  | -0.222 (-0.353, -0.091) | 0.00093 |
| WFS BC_15d (per 0.05 µg/m3) | -0.142 (-0.285, 0.001) | 0.052 |  | -0.202 (-0.340, -0.063) | 0.0045 |
| WFS BC_30d (per 0.05 µg/m3) | -0.106 (-0.256, 0.044) | 0.165 |  | -0.184 (-0.329, -0.038) | 0.014 |
| WFS BC_60d (per 0.05 µg/m3) | -0.087 (-0.296, 0.123) | 0.418 |  | -0.224 (-0.428, -0.021) | 0.031 |
| WFS days_7d (per 1 day) | -0.046 (-0.086, -0.006) | 0.025 |  | -0.042 (-0.081, -0.003) | 0.034 |
| WFS days_15d (per 1 day) | -0.017 (-0.039, 0.005) | 0.135 |  | -0.021 (-0.042, 0.000) | 0.054 |
| WFS days_30d (per 1 day) | -0.013 (-0.027, 0.001) | 0.067 |  | -0.016 (-0.030, -0.003) | 0.017 |
| WFS days_60d (per 1 day) | -0.002 (-0.010, 0.006) | 0.622 |  | -0.006 (-0.014, 0.001) | 0.109 |
| WFS area_7d (per IQR) | -0.016 (-0.028, -0.004) | 0.0070 |  | -0.017 (-0.028, -0.005) | 0.0042 |
| WFS area_15d (per IQR) | -0.025 (-0.052, 0.002) | 0.073 |  | -0.032 (-0.059, -0.006) | 0.017 |
| WFS area_30d (per IQR) | -0.016 (-0.057, 0.024) | 0.432 |  | -0.038 (-0.077, 0.001) | 0.059 |
| WFS area_60d (per IQR) | 0.005 (-0.068, 0.078) | 0.899 |  | -0.046 (-0.117, 0.025) | 0.204 |

Abbreviations: β, regression coefficient; BC, black carbon; CI, confidence interval; PM2.5, particle with aerodynamic diameter ≤ 2.5 µm; PM2.5 _X d, average PM2.5 concentration during the X days prior to the interview; SF-36, the short form 36 health survey questionnaire; WFS, Wildfire smoke.

* Models were adjusted for age, sex, ethnicity, BMI, education level, current smokers, pack-years, and prevalence of comorbidity. WFS estimates are the same as those reported in Table 3.

**Table S3. Associations of Individual Residential Addresses based Wildfire Smoke PM2.5 and BC Measures with SGRQ Scores (N=747) ***

| **Exposure** | **Activity** | |  | **Impacts** | |  | **Symptom** | |  | **Total** | |
| --- | --- | --- | --- | --- | --- | --- | --- | --- | --- | --- | --- |
| **β (95%CI)** | ***P*** |  | **β (95%CI)** | ***P*** |  | **β (95%CI)** | ***P*** |  | **β (95%CI)** | ***P*** |
| PM2.5_7d (per 1 µg/m3) | 0.54 (-0.30, 1.38) | 0.210 |  | 0.12 (-0.38, 0.63) | 0.629 |  | 0.61 (-0.16, 1.37) | 0.124 |  | 0.35 (-0.26, 0.96) | 0.265 |
| PM2.5_15d (per 1 µg/m3) | 0.56 (-0.34, 1.46) | 0.223 |  | 0.27 (-0.27, 0.82) | 0.326 |  | 0.61 (-0.22, 1.43) | 0.151 |  | 0.45 (-0.21, 1.10) | 0.183 |
| PM2.5_30d (per 1 µg/m3) | 0.44 (-0.57, 1.44) | 0.395 |  | 0.11 (-0.49, 0.71) | 0.723 |  | 0.42 (-0.50, 1.34) | 0.369 |  | 0.28 (-0.45, 1.01) | 0.451 |
| PM2.5_60d (per 1 µg/m3) | -0.01 (-1.12, 1.10) | 0.988 |  | -0.27 (-0.94, 0.39) | 0.421 |  | 0.09 (-0.93, 1.10) | 0.867 |  | -0.12 (-0.93, 0.68) | 0.764 |
| WFS PM2.5_7d (per 1 µg/m3) | 4.38 (-0.18, 8.94) | 0.060 |  | 3.93 (1.19, 6.67) | 0.0050 |  | 7.99 (3.85, 12.12) | 0.00017 |  | 4.84 (1.54, 8.14) | 0.0042 |
| WFS PM2.5_15d (per 1 µg/m3) | 6.02 (0.32, 11.72) | 0.039 |  | 5.30 (1.88, 8.72) | 0.0024 |  | 8.53 (3.34, 13.71) | 0.0013 |  | 6.33 (2.20, 10.46) | 0.0027 |
| WFS PM2.5_30d (per 1 µg/m3) | 3.57 (-1.41, 8.56) | 0.161 |  | 3.33 (0.33, 6.32) | 0.030 |  | 4.46 (-0.09, 9.01) | 0.055 |  | 3.69 (0.08, 7.31) | 0.046 |
| WFS PM2.5_60d (per 1 µg/m3) | 0.15 (-6.78, 7.07) | 0.967 |  | 1.77 (-2.40, 5.94) | 0.405 |  | 3.53 (-2.79, 9.85) | 0.274 |  | 1.66 (-3.37, 6.69) | 0.518 |
| WFS BC_7d (per 0.05 µg/m3) | 5.03 (-0.66, 10.72) | 0.083 |  | 3.81 (0.39, 7.23) | 0.030 |  | 10.10 (4.95, 15.26) | 0.0013 |  | 5.30 (1.18, 9.42) | 0.012 |
| WFS BC_15d (per 0.05 µg/m3) | 5.86 (-0.52, 12.25) | 0.072 |  | 4.11 (0.26, 7.95) | 0.037 |  | 8.77 (2.95, 14.58) | 0.0032 |  | 5.64 (1.01, 10.28) | 0.017 |
| WFS BC_30d (per 0.05 µg/m3) | 3.57 (-0.67, 7.81) | 0.099 |  | 2.31 (-0.24, 4.86) | 0.077 |  | 3.57 (-0.30, 7.44) | 0.071 |  | 2.93 (-0.14, 6.01) | 0.062 |
| WFS BC_60d (per 0.05 µg/m3) | 2.44 (-3.97, 8.86) | 0.455 |  | 1.86 (-2.00, 5.73) | 0.344 |  | 3.78 (-2.07, 9.64) | 0.206 |  | 2.37 (-2.29, 7.03) | 0.319 |

Abbreviations: β, regression coefficient; BC, black carbon; CI, confidence interval; PM2.5, particle with aerodynamic diameter ≤ 2.5 µm; PM2.5 _X d, average PM2.5 concentration during the X days prior to the interview; SGRQ, St. George’s Respiratory questionnaire; WFS, Wildfire smoke.

* Models were adjusted for age, sex, ethnicity, BMI, education level, current smokers, pack-years, and prevalence of airway obstruction (defined as FEV1/FVC ratio ≤ 70%). WFS estimates are generated against individual residential addresses using the same approach as the one used in Table 3.

**Table S4. Associations of Individual Residential Addresses based Wildfire Smoke PM2.5 and BC Measures with SF-36 Score (N=747) ***

| **Exposure** | **Mental Health Score** | |  | **Physical Health Score** | |
| --- | --- | --- | --- | --- | --- |
| **β (95%CI)** | ***P*** |  | **β (95%CI)** | ***P*** |
| PM2.5_7d (per 1 µg/m3) | -0.035 (-0.067, -0.004) | 0.028 |  | -0.039 (-0.070, -0.008) | 0.013 |
| PM2.5_15d (per 1 µg/m3) | -0.048 (-0.082, -0.015) | 0.005 |  | -0.047 (-0.080, -0.015) | 0.0049 |
| PM2.5_30d (per 1 µg/m3) | -0.052 (-0.089, -0.014) | 0.007 |  | -0.048 (-0.084, -0.011) | 0.011 |
| PM2.5_60d (per 1 µg/m3) | -0.037 (-0.078, 0.004) | 0.080 |  | -0.037 (-0.077, 0.004) | 0.074 |
| WFS PM2.5_7d (per 1 µg/m3) | -0.186 (-0.358, -0.013) | 0.035 |  | -0.159 (-0.327, 0.009) | 0.065 |
| WFS PM2.5_15d (per 1 µg/m3) | -0.236 (-0.451, -0.021) | 0.032 |  | -0.245 (-0.455, -0.035) | 0.022 |
| WFS PM2.5_30d (per 1 µg/m3) | -0.166 (-0.354, 0.021) | 0.083 |  | -0.231 (-0.414, -0.049) | 0.013 |
| WFS PM2.5_60d (per 1 µg/m3) | -0.106 (-0.366, 0.154) | 0.425 |  | -0.242 (-0.495, 0.012) | 0.062 |
| WFS BC_7d (per 0.05 µg/m3) | -0.189 (-0.404, 0.025) | 0.083 |  | -0.213 (-0.422, -0.004) | 0.046 |
| WFS BC_15d (per 0.05 µg/m3) | -0.184 (-0.425, 0.057) | 0.135 |  | -0.227 (-0.462, 0.008) | 0.058 |
| WFS BC_30d (per 0.05 µg/m3) | -0.138 (-0.298, 0.021) | 0.090 |  | -0.197 (-0.353, -0.042) | 0.013 |
| WFS BC_60d (per 0.05 µg/m3) | -0.092 (-0.333, 0.149) | 0.455 |  | -0.243 (-0.478, -0.008) | 0.043 |

Abbreviations: β, regression coefficient; BC, black carbon; CI, confidence interval; PM2.5, particle with aerodynamic diameter ≤ 2.5 µm; PM2.5 _X d, average PM2.5 concentration during the X days prior to the interview; SF-36, the short form 36 health survey questionnaire; WFS, Wildfire smoke.

* Models were adjusted for age, sex, ethnicity, BMI, education level, current smokers, pack-years, and prevalence of comorbidity. WFS estimates are generated against individual residential addresses using the same approach as the one used in Table 3.

**Table S5. Associations of Wildfire Smoke PM2.5 (per 1 µg/m3) with SGRQ Scores Using the County-Level Daily WFS Dataset Developed by Dr. Childs et al (N=747) ***

| **Exposure** | **Activity** | |  | **Impacts** | |  | **Symptom** | |  | **Total** | |
| --- | --- | --- | --- | --- | --- | --- | --- | --- | --- | --- | --- |
| **β (95%CI)** | ***P*** |  | **β (95%CI)** | ***P*** |  | **β (95%CI)** | ***P*** |  | **β (95%CI)** | ***P*** |
| WFS PM2.5_7d | 5.22 (1.13, 9.31) | 0.013 |  | 3.31 (0.85, 5.77) | 0.0086 |  | 6.26 (2.53, 9.99) | 0.0011 |  | 4.59 (1.63, 7.56) | 0.0025 |
| WFS PM2.5_15d | 1.01 (-4.61, 6.63) | 0.725 |  | 1.74 (-1.65, 5.14) | 0.315 |  | 1.57 (-3.60, 6.74) | 0.552 |  | 1.67 (-2.43, 5.76) | 0.426 |
| WFS PM2.5_30d | 1.84 (-2.84, 6.53) | 0.441 |  | 1.79 (-1.04, 4.62) | 0.216 |  | 1.61 (-2.71, 5.93) | 0.466 |  | 1.88 (-1.54, 5.30) | 0.282 |
| WFS PM2.5_60d | -0.93 (-6.44, 4.58) | 0.741 |  | 0.44 (-2.89, 3.78) | 0.794 |  | -0.37 (-5.44, 4.71) | 0.888 |  | -0.04 (-4.06, 3.98) | 0.984 |

Abbreviations: β, regression coefficient; CI, confidence interval; PM2.5, particle with aerodynamic diameter ≤ 2.5 µm; PM2.5 _X d, average PM2.5 concentration during the X days prior to the interview; SGRQ, St. George’s Respiratory questionnaire; WFS, Wildfire smoke.

* Models were adjusted for age, sex, ethnicity, BMI, education level, current smokers, pack-years, and prevalence of airway obstruction (defined as FEV1/FVC ratio ≤ 70%).

**Table S6. Associations of Wildfire Smoke PM2.5 (per 1 µg/m3) with SF-36 Score Using the County-Level Daily WFS Dataset Developed by Dr. Childs et al (N=747) ***

| **Exposure** | **Mental Health Score** | |  | **Physical Health Score** | |
| --- | --- | --- | --- | --- | --- |
| **β (95%CI)** | ***P*** |  | **β (95%CI)** | ***P*** |
| WFS PM2.5_7d | -0.223 (-0.376, -0.070) | 0.0044 |  | -0.236 (-0.385, -0.086) | 0.0020 |
| WFS PM2.5_15d | -0.130 (-0.339, 0.078) | 0.221 |  | -0.254 (-0.456, -0.052) | 0.014 |
| WFS PM2.5_30d | -0.098 (-0.272, 0.076) | 0.269 |  | -0.200 (-0.369, -0.031) | 0.020 |
| WFS PM2.5_60d | -0.054 (-0.258, 0.151) | 0.607 |  | -0.194 (-0.393, 0.004) | 0.055 |

Abbreviations: β, regression coefficient; CI, confidence interval; PM2.5, particle with aerodynamic diameter ≤ 2.5 µm; PM2.5 _X d, average PM2.5 concentration during the X days prior to the interview; SF-36, the short form 36 health survey questionnaire; WFS, Wildfire Smoke.

* Models were adjusted for age, sex, ethnicity, BMI, education level, current smokers, pack-years, and prevalence of comorbidity.

**Table S7. Adjusted β Coefficients for Associations Between 7-Days Average Wildfire PM2.5 exposure (WFS PM2.5_7d in Table 3) and HRQoL, Stratified by Over One Year of Woodsmoke Exposure**

| **Variable** | **Never (N= 506)** |  | **Ever (N= 241)** | **Interaction *P*** |
| --- | --- | --- | --- | --- |
| HRQoL: SGRQ * |  |  |  |  |
| Activity | 3.31 (-1.15, 7.77) |  | 9.16 (3.07, 15.26) | 0.128 |
| Impacts | 0.92 (-1.75, 3.59) |  | 7.36 (3.72, 11.01) | 0.0052 |
| Symptom | 3.06 (-0.97, 7.09) |  | 11.40 (5.89, 16.91) | 0.017 |
| Total | 2.17 (-1.04, 5.38) |  | 8.99 (4.61, 13.36) | 0.014 |
| HRQoL: SF-36 # |  |  |  |  |
| Mental Health Score | -0.17 (-0.34, 0.002) |  | -0.17 (-0.41, 0.06) | 0.963 |
| Physical Health Score | -0.16 (-0.32, 0.005) |  | -0.31 (-0.53, -0.08) | 0.300 |

Abbreviations: β, regression coefficient; HRQoL, Health-Related Quality of Life; PM2.5, particle with aerodynamic diameter ≤ 2.5 µm; SGRQ, St. George’s Respiratory questionnaire; SF-36, the short form 36 health survey questionnaire.

* Models were adjusted for age, sex, ethnicity, BMI, education level, current smokers, pack-years, and prevalence of airway obstruction (defined as FEV1/FVC ratio ≤ 70%).

# Models were adjusted for age, sex, ethnicity, BMI, education level, current smokers, pack-years, and prevalence of comorbidity.

**Table S8. Adjusted β Coefficients for Associations Between 7-Days Average Wildfire PM2.5 exposure (WFS PM2.5_7d in Table 3) and HRQoL, Stratified by Sex**

| **Variable** | **Male (N= 364)** |  | **Female (N= 383)** | **Interaction *P*** |
| --- | --- | --- | --- | --- |
| HRQoL: SGRQ * |  |  |  |  |
| Activity | 10.43 (3.93, 16.93) |  | 3.24 (-1.17, 7.64) | 0.073 |
| Impacts | 7.02 (3.12, 10.92) |  | 1.55 (-1.10, 4.19) | 0.024 |
| Symptom | 7.65 (1.71, 13.59) |  | 5.47 (1.44, 9.49) | 0.552 |
| Total | 8.65 (3.95, 13.35) |  | 2.85 (-0.34, 6.05) | 0.046 |
| HRQoL: SF-36 # |  |  |  |  |
| Mental Health Score | -0.28 (-0.52, -0.04) |  | -0.12 (-0.29, 0.04) | 0.314 |
| Physical Health Score | -0.48 (-0.72, -0.24) |  | -0.09 (-0.25, 0.07) | 0.0083 |

Abbreviations: β, regression coefficient; HRQoL, Health-Related Quality of Life; PM2.5, particle with aerodynamic diameter ≤ 2.5 µm; SGRQ, St. George’s Respiratory questionnaire; SF-36, the short form 36 health survey questionnaire.

* Models were adjusted for age, sex, ethnicity, BMI, education level, current smokers, pack-years, and prevalence of airway obstruction (defined as FEV1/FVC ratio ≤ 70%).

# Models were adjusted for age, sex, ethnicity, BMI, education level, current smokers, pack-years, and prevalence of comorbidity.

**Table S9. Adjusted β Coefficients for Associations Between 7-Days Average Wildfire PM2.5 exposure (WFS PM2.5_7d in Table 3) and HRQoL, Stratified by Education Level**

| **Variable** | **< College (N= 268)** |  | **≥ College (N= 479)** | **Interaction *P*** |
| --- | --- | --- | --- | --- |
| HRQoL: SGRQ * |  |  |  |  |
| Activity | 12.17 (4.71, 19.63) |  | 3.4 (-0.77, 7.58) | 0.045 |
| Impacts | 9.12 (4.65, 13.59) |  | 1.43 (-1.08, 3.93) | 0.0035 |
| Symptom | 11.90 (5.10, 18.7) |  | 4.34 (0.53, 8.15) | 0.058 |
| Total | 11.09 (5.70, 16.48) |  | 2.66 (-0.36, 5.68) | 0.0078 |
| HRQoL: SF-36 # |  |  |  |  |
| Mental Health Score | -0.16 (-0.44, 0.12) |  | -0.17 (-0.33, -0.02) | 0.951 |
| Physical Health Score | -0.44 (-0.71, -0.17) |  | -0.14 (-0.30, 0.01) | 0.066 |

Abbreviations: β, regression coefficient; HRQoL, Health-Related Quality of Life; PM2.5, particle with aerodynamic diameter ≤ 2.5 µm; SGRQ, St. George’s Respiratory questionnaire; SF-36, the short form 36 health survey questionnaire.

* Models were adjusted for age, sex, ethnicity, BMI, education level, current smokers, pack-years, and prevalence of airway obstruction (defined as FEV1/FVC ratio ≤ 70%).

# Models were adjusted for age, sex, ethnicity, BMI, education level, current smokers, pack-years, and prevalence of comorbidity.

**Table S10. Adjusted β Coefficients for Associations Between 7-Days Average Wildfire PM2.5 exposure (WFS PM2.5_7d in Table 3) and HRQoL, Stratified by Smoking Status**

| **Variable** | **Former Smoker (N=300)** |  | **Current Smoker (N= 447)** | **Interaction *P*** |
| --- | --- | --- | --- | --- |
| HRQoL: SGRQ * |  |  |  |  |
| Activity | 5.58 (0.56, 10.6) |  | 5.44 (0.13, 10.74) | 0.970 |
| Impacts | 3.23 (0.21, 6.25) |  | 3.32 (0.13, 6.51) | 0.969 |
| Symptom | 6.24 (1.66, 10.82) |  | 6.06 (1.22, 10.90) | 0.958 |
| Total | 4.69 (1.06, 8.32) |  | 4.68 (0.84, 8.53) | 0.998 |
| HRQoL: SF-36 # |  |  |  |  |
| Mental Health Score | -0.28 (-0.47, -0.09) |  | -0.05 (-0.25, 0.15) | 0.110 |
| Physical Health Score | -0.22 (-0.40, -0.04) |  | -0.21 (-0.41, -0.02) | 0.958 |

Abbreviations: β, regression coefficient; HRQoL, Health-Related Quality of Life; PM2.5, particle with aerodynamic diameter ≤ 2.5 µm; SGRQ, St. George’s Respiratory questionnaire; SF-36, the short form 36 health survey questionnaire.

* Models were adjusted for age, sex, ethnicity, BMI, education level, current smokers, pack-years, and prevalence of airway obstruction (defined as FEV1/FVC ratio ≤ 70%).

# Models were adjusted for age, sex, ethnicity, BMI, education level, current smokers, pack-years, and prevalence of comorbidity.

**Table S11. Adjusted β Coefficients for Associations Between 7-Days Average Wildfire PM2.5 exposure (WFS PM2.5_7d in Table 3) and HRQoL, Stratified by Hispanic Ethnicity**

| **Variable** | **Non-Hispanic (N= 562)** |  | **Hispanic (N=185)** | **Interaction *P*** |
| --- | --- | --- | --- | --- |
| HRQoL: SGRQ * |  |  |  |  |
| Activity | 5.31 (1.22, 9.40) |  | 6.29 (-1.8, 14.38) | 0.832 |
| Impacts | 2.69 (0.23, 5.15) |  | 5.53 (0.67, 10.39) | 0.308 |
| Symptom | 6.21 (2.48, 9.94) |  | 5.94 (-1.44, 13.32) | 0.949 |
| Total | 4.31 (1.34, 7.28) |  | 6.13 (0.27, 11.99) | 0.588 |
| HRQoL: SF-36 # |  |  |  |  |
| Mental Health Score | -0.18 (-0.33, -0.03) |  | -0.14 (-0.45, 0.16) | 0.823 |
| Physical Health Score | -0.21 (-0.36, -0.06) |  | -0.23 (-0.53, 0.06) | 0.885 |

Abbreviations: β, regression coefficient; HRQoL, Health-Related Quality of Life; PM2.5, particle with aerodynamic diameter ≤ 2.5 µm; SGRQ, St. George’s Respiratory questionnaire; SF-36, the short form 36 health survey questionnaire.

* Models were adjusted for age, sex, ethnicity, BMI, education level, current smokers, pack-years, and prevalence of airway obstruction (defined as FEV1/FVC ratio ≤ 70%).

# Models were adjusted for age, sex, ethnicity, BMI, education level, current smokers, pack-years, and prevalence of comorbidity.

**Table S12. Adjusted β Coefficients for Associations Between 7-Days Average Wildfire PM2.5 exposure (WFS PM2.5_7d in Table 3) and HRQoL, Stratified by CMH Status**

| **Variable** | **Non-CMH (N= 518)** |  | **CMH (N= 229)** | **Interaction *P*** |
| --- | --- | --- | --- | --- |
| HRQoL: SGRQ * |  |  |  |  |
| Activity | 4.50 (-0.19, 9.19) |  | 5.06 (-0.48, 10.59) | 0.880 |
| Impacts | 2.71 (-0.06, 5.48) |  | 2.54 (-0.73, 5.82) | 0.938 |
| Symptom | 3.83 (-0.15, 7.81) |  | 5.89 (1.19, 10.59) | 0.512 |
| Total | 3.66 (0.35, 6.97) |  | 4.08 (0.17, 7.98) | 0.872 |
| HRQoL: SF-36 # |  |  |  |  |
| Mental Health Score | -0.21 (-0.39, -0.03) |  | -0.09 (-0.30, 0.12) | 0.376 |
| Physical Health Score | -0.12 (-0.29, 0.05) |  | -0.29 (-0.49, -0.09) | 0.220 |

Abbreviations: β, regression coefficient; HRQoL, Health-Related Quality of Life; PM2.5, particle with aerodynamic diameter ≤ 2.5 µm; SGRQ, St. George’s Respiratory questionnaire; SF-36, the short form 36 health survey questionnaire.

* Models were adjusted for age, sex, ethnicity, BMI, education level, current smokers, pack-years, and prevalence of airway obstruction (defined as FEV1/FVC ratio ≤ 70%).

# Models were adjusted for age, sex, ethnicity, BMI, education level, current smokers, pack-years, and prevalence of comorbidity.

**Table S13. Adjusted β Coefficients for Associations Between 7-Days Average Wildfire PM2.5 exposure (WFS PM2.5_7d in Table 3) and HRQoL, Stratified by History of Pulmonary Disease**

| **Variable** | **No (N=647)** |  | **Yes (N= 100)** | **Interaction *P*** |
| --- | --- | --- | --- | --- |
| HRQoL: SGRQ * |  |  |  |  |
| Activity | 4.10 (0.30, 7.90) |  | 6.10 (-2.55, 14.75) | 0.677 |
| Impacts | 1.88 (-0.37, 4.13) |  | 6.08 (0.94, 11.22) | 0.142 |
| Symptom | 4.99 (1.51, 8.47) |  | 6.33 (-1.59, 14.26) | 0.761 |
| Total | 3.24 (0.55, 5.93) |  | 6.47 (0.33, 12.60) | 0.344 |
| HRQoL: SF-36 # |  |  |  |  |
| Mental Health Score | -0.13 (-0.28, 0.02) |  | -0.38 (-0.72, -0.03) | 0.198 |
| Physical Health Score | -0.15 (-0.29, -0.01) |  | -0.48 (-0.81, -0.15) | 0.074 |

Abbreviations: β, regression coefficient; HRQoL, Health-Related Quality of Life; PM2.5, particle with aerodynamic diameter ≤ 2.5 µm; SGRQ, St. George’s Respiratory questionnaire; SF-36, the short form 36 health survey questionnaire.

* Models were adjusted for age, sex, ethnicity, BMI, education level, current smokers, pack-years, and prevalence of airway obstruction (defined as FEV1/FVC ratio ≤ 70%).

# Models were adjusted for age, sex, ethnicity, BMI, education level, current smokers, pack-years, and prevalence of comorbidity.

**
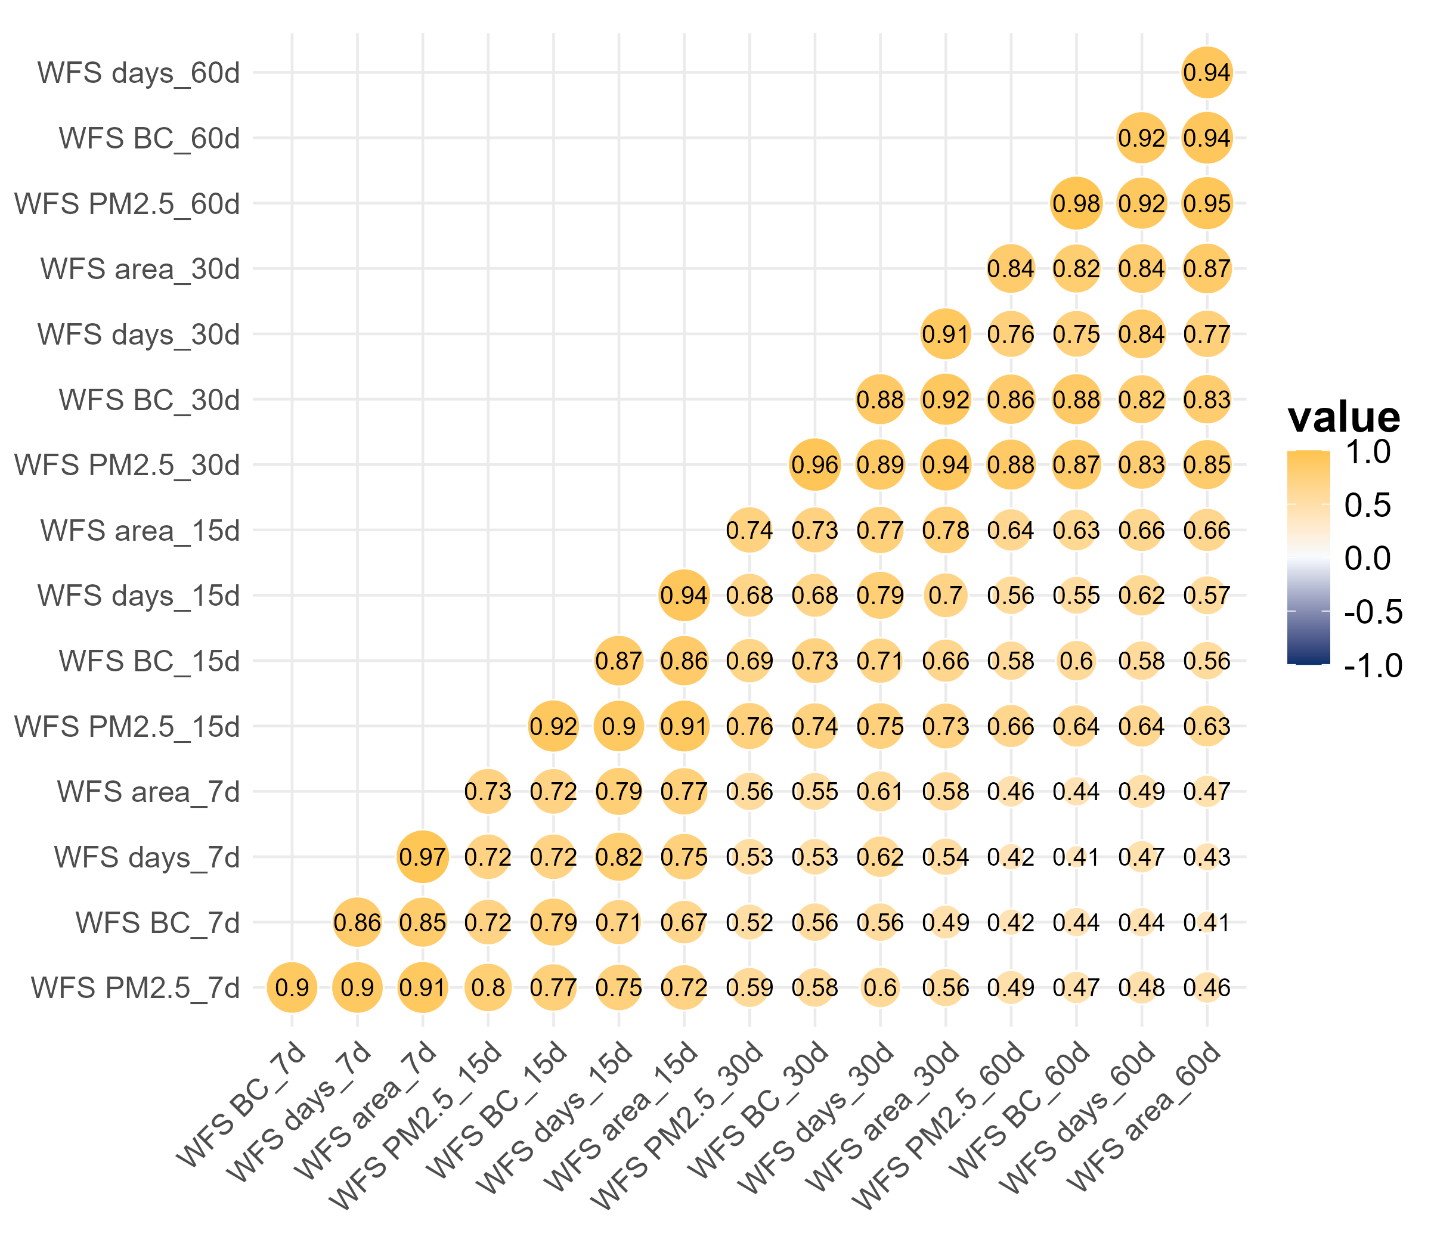
**

**Figure S1.** Spearman correlations of wildfire smoke measures in LSC subjects. WFS estimates are the same as those reported in Table 3.

Abbreviations: WFS, wildfire smoke; BC, Black carbon
